# Supplementary material for: UK Adults’ Exercise Locations, Use of Digital Programs, and Associations with Physical Activity During the COVID-19 Pandemic: Longitudinal Analysis of Data From the Health Behaviours During the COVID-19 Pandemic Study
Source: JMIR Form Res. 2022 Jun 21;6(6):e35021. doi: 10.2196/35021 (PMC9217149; doi:10.2196/35021)
Supplement: Multimedia Appendix 13 [file formative_v6i6e35021_app13.docx]

## Multimedia Appendix 13 – Complete case analysis, predictors of meeting MVPA, MSA, and full recommendations (vs not) at FU1, FU2, and FU3. GLMM estimates with key predictors only and using exercising outside (vs inside the home environment only).

|  | MVPAa | MSAa | Full PA recommendationsa |
| --- | --- | --- | --- |
|  | OR  (95% CI) | OR  (95% CI) | OR  (95% CI) |
| Time | 0.84 (0.75-0.95)** | 0.88 (0.77-1.00) | 0.80 (0.69-0.92)** |
| Exercising outside (ref: inside only) | 4.31 (2.57-7.23)*** | 0.52 (0.30-0.90)* | 2.12 (1.17-3.87)* |
| Use of digital PA programs (ref: not) | 0.78 (0.57-1.05) | 8.23 (5.79-11.69)*** | 3.50 (2.48-4.95)*** |
| Time x location interaction | 1.07 (0.92-1.24) | 1.06 (0.90-1.23) | 1.06 (0.88-1.27) |
| Age (ref: < 35 years) |  |  |  |
| 35-64 years | 2.82 (1.72-4.64)*** | 0.82 (0.46-1.46) | 1.96 (1.09-3.52)* |
| > 64 years | 2.08 (1.13-3.83)* | 0.55 (0.27-1.14) | 1.36 (0.67-2.79) |
| Female gender (ref: all other) | 0.58 (0.40-0.83)** | 0.46 (0.29-0.71)*** | 0.62 (0.40-0.95)* |
| White ethnicity (ref: non-white) | 1.67 (0.75-3.75) | 0.63 (0.24-1.63) | 0.78 (0.30-1.99) |
| High education (ref: <16 years) | 0.72 (0.40-1.29) | 0.77 (0.39-1.56) | 0.65 (0.33-1.29) |
| Condition limiting PA (ref: none) | 0.30 (0.17-0.53)*** | 1.15 (0.60-2.21) | 0.58 (0.29-1.14) |
| England (ref: all other UK countries) | 0.63 (0.39-1.02) | 1.24 (0.71-2.19) | 0.70 (0.40-1.21) |
| Indoor space (ref: none) | 0.92 (0.65-1.30) | 3.51 (2.29-5.38)*** | 2.13 (1.41-3.21)*** |
| Employed (ref: not employed) | 0.53 (0.39-0.74)*** | 0.71 (0.49-1.03) | 0.62 (0.42-0.90) |
| BMI | 0.93 (0.89-0.96)*** | 0.87 (0.83-0.91)*** | 0.89 (0.85-0.94)*** |
| High perceived risk of COVID-19 (ref: low) | 0.88 (0.63-1.23) | 1.22 (0.84-1.78) | 1.08 (0.72-1.60) |
| Total isolation (ref: not) | 0.68 (0.27-1.70) | 1.52 (0.59-3.89) | 0.61 (0.19-1.94) |
| Smoker (ref: not) | 0.90 (0.53-1.53) | 0.39 (0.20-0.76)** | 0.50 (0.25-0.99)* |
| High alcohol consumption (ref: <14 units/week) | 0.80 (0.58-1.11) | 0.64 (0.44-0.94)* | 0.63 (0.43-0.95)* |

**P* <.05; ***P* <.01; ****P* <.001; aN=3225 observations, n=1075 individuals. BFs for non-significant associations with digital PA program use were BF=0.08 (MVPA). ref=reference. OR=odds ratio. CI=confidence interval.
